# Supplementary material for: Adverse Childhood Experiences and Their Relationship with Poor Sexual Health Outcomes: Results from Four Cross-Sectional Surveys
Source: MDPI journal article supplement (doi:10.3390/ijerph19148869), 2022-07-21
Supplement: s1 [file s1]

**Table S1.** Individual survey sample characteristics.

| Country | Study location     | Stratification for sampling                        | Dates          | Age Range<br>(years) | Final sample <sup>d</sup><br>(n) | Compliance <sup>e</sup> | Deprivation<br>Measure | Reference |
|---------|--------------------|----------------------------------------------------|----------------|----------------------|----------------------------------|-------------------------|------------------------|-----------|
| England | North West England | Blackburn with Darwen Local Authority <sup>a</sup> | 2012 (Aug-Sep) | 18-70 <sup>c</sup>   | 1500                             | 70.4%                   | IMD 2010               | [1]       |
| England | National sample    | English Administrative Regions (n=10) <sup>b</sup> | 2013 (Apr-Jul) | 18-69                | 4010                             | 53.5%                   | IMD 2010               | [2]       |
| England | South of England   | Luton, Hertfordshire Northamptonshire (n=3)        | 2015 (Jun-Sep) | 18-69                | 5623                             | 55.8%                   | IMD 2011               | [3]       |
| Wales   | National sample    | Welsh Health Regions (n=7)                         | 2015 (Feb-May) | 18-69                | 2028                             | 49.1%                   | WIMD 2014              | [4]       |

<sup>a</sup>No sub-regional stratification was undertaken in Blackburn with Darwen due to the relatively small size of the sample area. <sup>b</sup>London was split into Inner and Outer London for regional sampling. <sup>c</sup>Individuals aged 70 years were excluded from the final sample (see methods). IMD = Index of Multiple Deprivation; WIMD = Welsh Index of Multiple Deprivation. <sup>d</sup>Sample sizes were determined for each study area in order to ensure, for analytical purposes, adequate representation of individuals with higher ACE counts. <sup>e</sup>Individuals not completing all questions on variables of interest were excluded.

#### References

- (1) Bellis, M.A., Lowey, H., Leckenby, N., Hughes, K., Harrison, D. Adverse childhood experiences: retrospective study to determine their impact on adult health behaviours and health outcomes in a UK population, *J Public Health*, 2014, 36 (1), 81–91.
- (2) Bellis, M. A.; Hughes, K.; Leckenby, N.; Hardcastle, K. A.; Perkins, C.; Lowey, H. Measuring mortality and the burden of adult disease associated with adverse childhood experiences in England: a national survey. *J Public Health*, 2015, 37 (3), 445–454.
- (3) Ford K, Butler N, Hughes K, Bellis MA. Adverse childhood experiences (ACEs) in Herfordshire, Luton and Northamptonshire. Liverpool: Liverpool John Moores University, 2016.
- (4) Bellis, M.A., Ashton, K., Hughes, K., Ford, K., Bishop, J., Paranjothy, S. Adverse childhood experiences and their impact on health-harming behaviours in the Welsh adult population. Cardiff: Public Health Wales, 2015.

**Table S2.** Adverse childhood experiences, born to a teenage mother and sexual health outcomes.

| <b>ACE questions.</b> All ACE questions were preceded by the statement “While you were growing up, before the age of 18...” |                                                                                                                                                                                                                                                                                                                                                                                |                                                |
|-----------------------------------------------------------------------------------------------------------------------------|--------------------------------------------------------------------------------------------------------------------------------------------------------------------------------------------------------------------------------------------------------------------------------------------------------------------------------------------------------------------------------|------------------------------------------------|
| <b>ACE</b>                                                                                                                  | <b>Question</b>                                                                                                                                                                                                                                                                                                                                                                | <b>Qualifying response</b>                     |
| <i>Physical abuse</i>                                                                                                       | How often did a parent or adult in your home ever hit, beat, kick, or physically hurt you in any way? This does not include gentle smacking for punishment?                                                                                                                                                                                                                    | Once or more than once                         |
| <i>Verbal abuse</i>                                                                                                         | How often did a parent or adult in your home ever swear at you, insult you, or put you down?                                                                                                                                                                                                                                                                                   | More than once                                 |
| <i>Sexual abuse</i>                                                                                                         | How often did anyone at least 5 years older than you (including adults) ever touch you sexually?<br><br>How often did anyone at least 5 years older than you (including adults) try to make you touch them sexually?<br><br>How often did anyone at least 5 years older than you (including adults) force you to have any type of sexual intercourse (oral, anal, or vaginal)? | Once or more than once to any of the questions |
| <i>Parental separation</i>                                                                                                  | Were your parents ever separated or divorced?                                                                                                                                                                                                                                                                                                                                  | Yes                                            |
| <i>Domestic violence</i>                                                                                                    | How often did your parents or adults in your home ever slap, hit, kick, punch, or beat each other up?                                                                                                                                                                                                                                                                          | Once or more than once                         |
| <i>Mental illness</i>                                                                                                       | Did you live with anyone who was depressed, mentally ill, or suicidal?                                                                                                                                                                                                                                                                                                         | Yes                                            |
| <i>Alcohol abuse</i>                                                                                                        | Did you live with anyone who was a problem drinker or alcoholic?                                                                                                                                                                                                                                                                                                               | Yes                                            |
| <i>Drug abuse</i>                                                                                                           | Did you live with anyone who used illegal street drugs or who abused prescription medications?                                                                                                                                                                                                                                                                                 | Yes                                            |
| <i>Incarceration</i>                                                                                                        | Did you live with anyone who served time or was sentenced to serve time in a prison or young offenders' institution?                                                                                                                                                                                                                                                           | Yes                                            |
| <b>Teenage mother</b>                                                                                                       |                                                                                                                                                                                                                                                                                                                                                                                |                                                |
| <i>Born to teenage mother</i>                                                                                               | Approximately how old was your mother when you were born? (age years)                                                                                                                                                                                                                                                                                                          | Aged 18 or less                                |
| <b>Sexual health outcomes</b>                                                                                               |                                                                                                                                                                                                                                                                                                                                                                                |                                                |
